# Supplementary material for: Humor at work: validation of the short work-related Humor Styles Questionnaire (swHSQ)
Source: publisher site journal article supplement (doi:10.1515/humor-2015-0118), 2016-01-01
Supplement: Supplementary file 1 [file Supplementary-160328_swHSQ_short_bios.docx]

Tabea Scheelis currently interim professor at the University of Leipzig, Germany, where she also received her PhD from. She worked as a researcher and lecturer at the University of Vienna, Austria, the Humboldt Universitaet zu Berlin, Free University of Berlin and LMU Munich. Her research focuses on the functions of humor at work. She published work on human resource management, error culture and psychological contracts.

Cornelia Gerdenitsch is a PhD student at the Faculty of Vienna (University of Vienna, Institute of Applied Psychology: Work, Education, Economy). Her research interests are suited in the field of flexible working and spatial office configurations for flexible work (coworking spaces, activity-based flexible offices). She is further interested in strategies to deal with demands that occurs in flexible working context.

Christian Korunka, PhD is full professor for Work & Organizational Psychology at the Department of Applied Psychology the University of Vienna, Austria. He is author of many scientific articles dealing with organizational change, quality of working life, and entrepreneurship. His current research interests are new job demands and work stress.
