# Supplementary material for: Humor at work: validation of the short work-related Humor Styles Questionnaire (swHSQ)
Source: publisher site journal article supplement (doi:10.1515/humor-2015-0118), 2016-01-01
Supplement: Supplementary file 2 [file Supplementary-swHSQ_title_160303.docx]

Humor at Work: Validation of the Short Work-Related Humor Styles Questionnaire (swHSQ)

Tabea E. Scheel

Humboldt-University of Berlin

Cornelia Gerdenitsch and Christian Korunka

University of Vienna

Author Note

Tabea Eleonore Scheel, Department of Social and Organizational Psychology, Humboldt-University of Berlin, Germany. Cornelia Gerdenitsch, Department of Applied Psychology: Work, Education, Economy, University of Vienna. Christian Korunka, Department of Applied Psychology: Work, Education, Economy, University of Vienna.

This work was funded by a personal Postdoc research grant from the Alexander von Humboldt-foundation (Germany) to the first author. An earlier version of this paper was presented at the SIOP conference, 2014, Honolulu/U.S.

Correspondence concerning this article should be addressed to Tabea Scheel, Faculty of Life Sciences, Institute for Psychology, Department of Social and Organizational Psychology, Rudower Chaussee 18, 12489 Berlin, Germany, phone: +49-30-2093 99129, email: tabea.scheel@hu-berlin.de

Tabea Scheel is a Postdoc researcher at the Humboldt University of Berlin, Germany. She spent two years at the University of Vienna (Austria) with an Alexander von Humboldt-scholarship and received her PhD from the University of Leipzig, Germany. Her research focuses on the functions of humor at work. Tabea published work on human resource management, error culture and psychological contracts.

Cornelia Gerdenitsch is a PhD candidate at the University of Vienna, Austria. Her research interests are New Ways of Working, including Coworking Spaces and flexibility issues, as well as job demands and resources.

Christian Korunka, PhD is full professor for Work & Organizational Psychology at the Department of Applied Psychology the University of Vienna, Austria. He is author of many scientific articles dealing with organizational change, quality of working life, and entrepreneurship. His current research interests are new job demands and work stress.
